# Supplementary material for: Time-Restricted Feeding Attenuates Metabolic Dysfunction-Associated Steatohepatitis and Hepatocellular Carcinoma in Obese Male Mice
Source: MDPI journal article supplement (doi:10.3390/cancers16081513), 2024-04-16
Supplement: s1 [file s1]

**Supplementary Table S1: Primers for QPCR**

| Gene name                     | Oligonucleotides sequences                                               |                             |
|-------------------------------|--------------------------------------------------------------------------|-----------------------------|
| <b>Cidea</b>                  | Forward: TGACATTCATGGGATTGCAGAC<br>Reverse: GGCCAGTTGTGATGACTAAGAC       | Integrated DNA Technologies |
| <b>Cidec</b>                  | Forward: GATGGACTACGCCATGAAGTC<br>Reverse: GTGCTCACTGCCACATGC            | Integrated DNA Technologies |
| <b>Cd36</b>                   | Forward: GGACATTGAGATTCTTTTCCTCTG<br>Reverse: GCAAAGGCATTGGCTGGAAGAAC    | Integrated DNA Technologies |
| <b>Acc2</b>                   | Forward: TGAATCTCACGCGCCTACTA<br>Reverse: GCCTCTCTTACCAGATGGA            | Integrated DNA Technologies |
| <b>Fasn</b>                   | Forward: GGCATCATTGGGCACTCCTT<br>Reverse: GCTGCAAGCACAGCCTCTCT           | Integrated DNA Technologies |
| <b>Emr1 (F4/80)</b>           | Forward: CTTTGGCTATGGGCTTCCAGTC<br>Reverse: GCAAGGAGGACAGAGTTTATCGTG     | Integrated DNA Technologies |
| <b>Clec4f</b>                 | Forward: GAGGCCGAGCTGAACAGAG<br>Reverse: TGTGAAGCCACCACAAAAAGAG          | Integrated DNA Technologies |
| <b>Cd12</b>                   | Forward: TTAATGCCCCACTCACCTGC<br>Reverse: GAGCTTGGTGACAAATACTACAGC       | Integrated DNA Technologies |
| <b>Cd68</b>                   | Forward: TGTCTGATCTTGCTAGGACCG<br>Reverse: GAGAGTAACGGCCTTTTTGTGA        | Integrated DNA Technologies |
| <b>IL6</b>                    | Forward: GCTACCAAACCTGGATATAATCAGGA<br>Reverse: CCAGGTAGCTATGGTACTCCAGAA | Integrated DNA Technologies |
| <b>IL10</b>                   | Forward: GCTCTTACTGACTGGCATGAG<br>Reverse: CGCAGCTCTAGGAGCATGTG          | Integrated DNA Technologies |
| <b>TNF<math>\alpha</math></b> | Forward: TGAGACCAGCCTGTGCTATG<br>Reverse: AAGCCAAAGCTGGTCAGTCTA          | Integrated DNA Technologies |
| <b>Fn1</b>                    | Forward: TGGTGGCCACTAAATACGAA<br>Reverse: GGAGGGCTAACATTCTCCAG           | Integrated DNA Technologies |
| <b>Timp1</b>                  | Forward: CCAGAGCCGTCACCTTGC TT<br>Reverse: AGGAAAAGTAGACAGT GTTCAGGCTT   | Integrated DNA Technologies |
| <b>Acta2</b>                  | Forward:CTGAGCGTGGCTATTCCTTC<br>Reverse:CTTCTGCATCCTGTCAGCAA             | Integrated DNA Technologies |
| <b>Colla1</b>                 | Forward:CACCCTCAAGAGCCTGAGTC<br>Reverse:GTTTCGGGCTGATGTACCAGT            | Integrated DNA Technologies |
| <b>Coll3a1</b>                | Forward: GACCAAAGGTGATGCTGGACAG<br>Reverse:CAAGACCTCGTGCTCCAGTTAG        | Integrated DNA Technologies |
| <b>Coll4a1</b>                | Forward:ATGGCTTGCCTGGAGAGATAGG<br>Reverse:TGGTTGCCCTTTGAGTCCTGGA         | Integrated DNA Technologies |
